# Supplementary material
Source: PubMed Central journal article supplement (PMC1637566)

**a**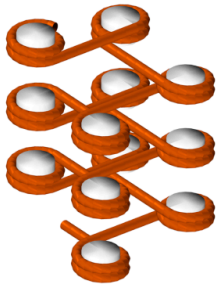**b**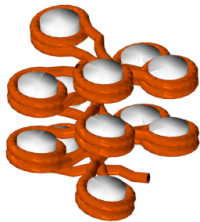**c**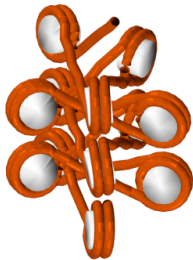**d**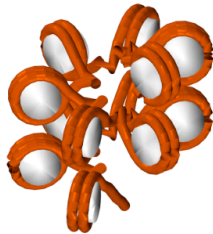**e**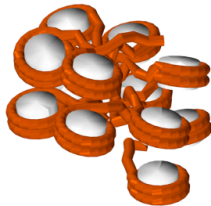

Supplement: pnas_0604817103_1.pdf [file pnas_0604817103_1.pdf]
